# Supplementary material
Source: PubMed Central journal article supplement (PMC4907836)
Supplement: NIHMS786638-supplement-Supplement.pdf [file NIHMS786638-supplement-Supplement.pdf]

**Table S1:** Quantitative PCR primer sequences

| Gene               | 5' Primer                 | 3' Primer                |
|--------------------|---------------------------|--------------------------|
| <i>Adipoq</i>      | AAGGGAGAGAAAGGAGATGCAGGT  | ACACTGAACGCTGAGCGATACACA |
| <i>Abcg1</i>       | ACCTACCACAACCCAGCAGACTTT  | GGTGCCAAAGAAACGGGTTACAT  |
| <i>Cd11c</i>       | TTCAAGCAGAGCCAGAACTTCCCA  | TGATGCTACCCGAGCCATCAATCA |
| <i>Cd68</i>        | ACCGCTTATAGCCCAAGGAACAGA  | TGTGGCTGTAGGTGTCATCGTGAA |
| <i>Cebpb</i>       | AAGCTGAGCGACGAGTACAAGATG  | TTGAACAAGTTCCGCAGGGTGCT  |
| <i>Cyp7a</i>       | TGATCCTCTGGGCATCTCAAGCAA  | AGCTCTTGGCCAGCACTCTGTAAT |
| <i>Fasn</i>        | GGTGTGGTGGGTTTGGTGAATTGT  | TTGCTGAGGTTGGACAGCAGGATA |
| <i>Fxr/Nr1h4</i>   | TGGCTGAATGTATGTATACAGGTTT | CAGCGTGCTGCTTCACATTT     |
| <i>Gpbar1/Tgr5</i> | TTATGGCCTCCTGTTGCCTG      | GCCAGGGTTGAGGGTACATC     |
| <i>Hmgcr</i>       | GTCCAATTTGGCAGCTCAGCCATT  | TCCAGCGACTATGAGCGTGAACAA |
| <i>Lxra/Nr1h3</i>  | TGCTGAGTTTGCTCTGCTCATTGC  | TGTGTTGCAGCCTCTCTACTTGGA |
| <i>Mcp1</i>        | TCACCTGCTGCTACTCATTACCA   | AGCACAGACCTCTCTCTTGAGCTT |
| <i>Scd1</i>        | ACAGCCTGTTTCGTTAGCACCTTCT | CCCGGGATTGAATGTTCTTGTCGT |
| <i>Sod1</i>        | GGTGTGGCCAATGTGTCCATTGAA  | CCACCTTTGCCCAAGTCATCTTGT |
| <i>Tnf</i>         | TCTCAGCCTCTTCTCATTCTGCT   | AGAAGTATGAGAGGGAGGCCATT  |
| <i>Gapdh</i>       | GTGAAGGTCGGTGTGAACGGATTT  | TGGCAACAATCTCCACTTTGCCAC |
| <i>Ubc</i>         | AGGTCAAACAGGAAGACAGACGTA  | TCACACCCAAGAACAAGCACA    |
